# Supplementary material for: All-lignin converted graphene quantum dot/graphene nanosheet hetero-junction for high-rate and boosted specific capacitance supercapacitors
Source: PubMed Central journal article supplement — Nanoscale Adv. 2021 Mar 5;3(9):2529–37. doi: 10.1039/d0na01024c (PMC9418623; doi:10.1039/d0na01024c), 2021-03-05
Supplement: NA-003-D0NA01024C-s001.pdf [file NA-003-D0NA01024C-s001.pdf]

**All lignin converted graphene quantum dots / graphene nanosheet  
hetero-junction for high-rate and boosted specific capacitance  
supercapacitor**

**Zheyuan Ding, Xiuwen Mei and Xiluan Wang\***

*Beijing Key Laboratory of Lignocellulosic Chemistry, Beijing Forestry University,  
Beijing, 100083, P. R. China*

**\*Corresponding author. Tel: +86-10-62336903. E-mail: wangxiluan@bjfu.edu.cn**

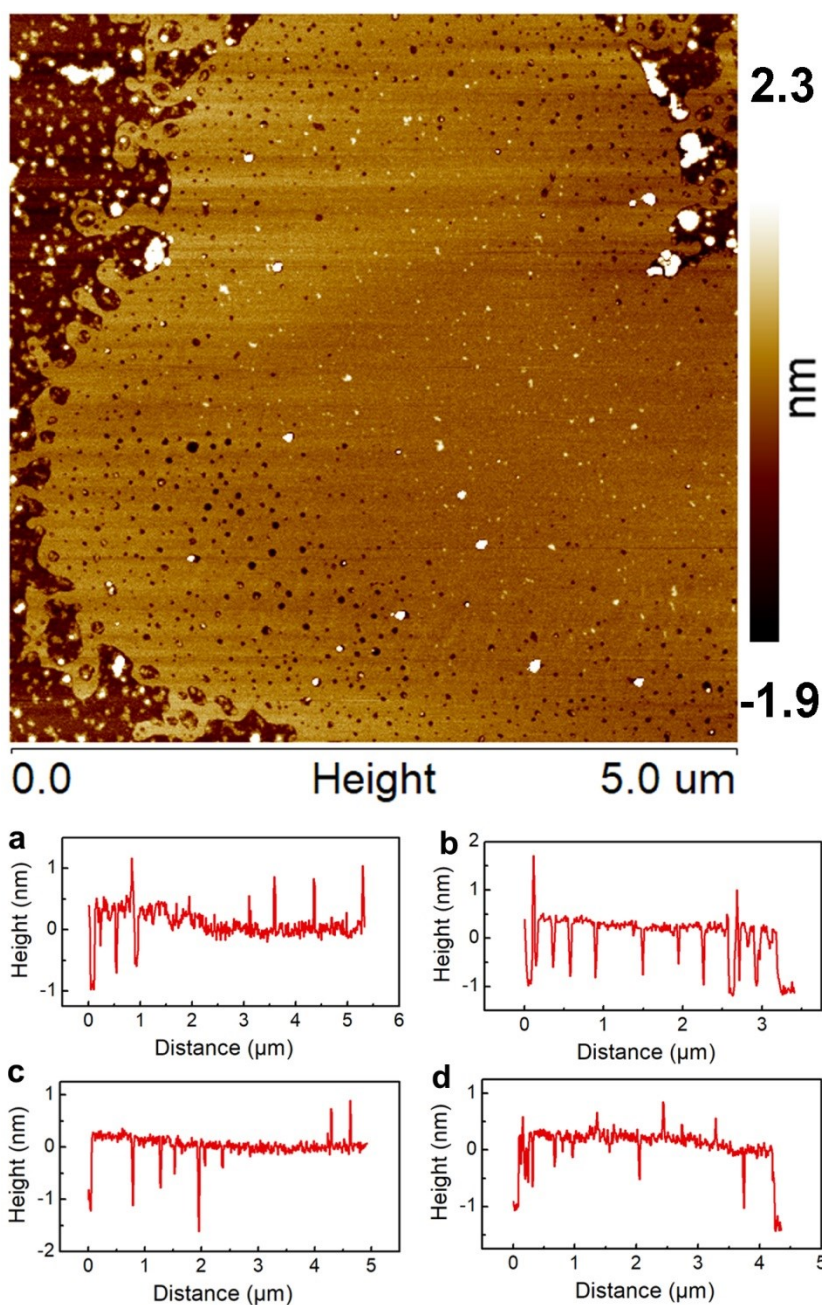

**Fig. S1** The enlarged AFM figure of GQDs/Gr in Fig.1 (a-d) AFM profile of GQDs/BL-G within different directions (randomly chosen), indicative of the GQDs located on the porous graphene.

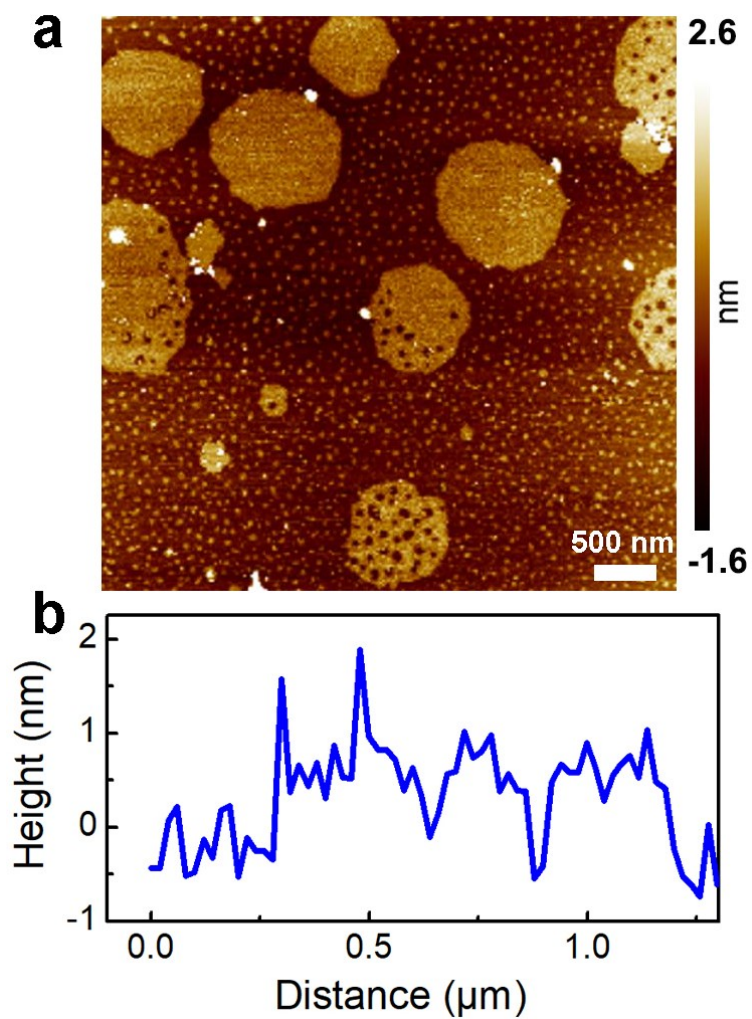

**Fig. S2** (a) AFM image and (b) corresponding profile of GQDs/Gr.

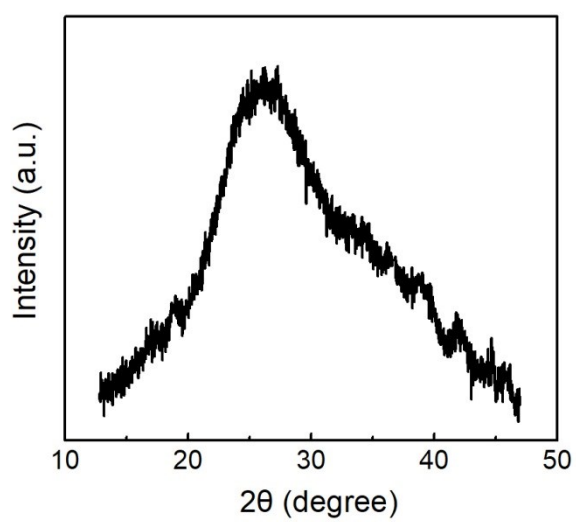

**Fig. S3** The XRD pattern of GQDs/Gr.

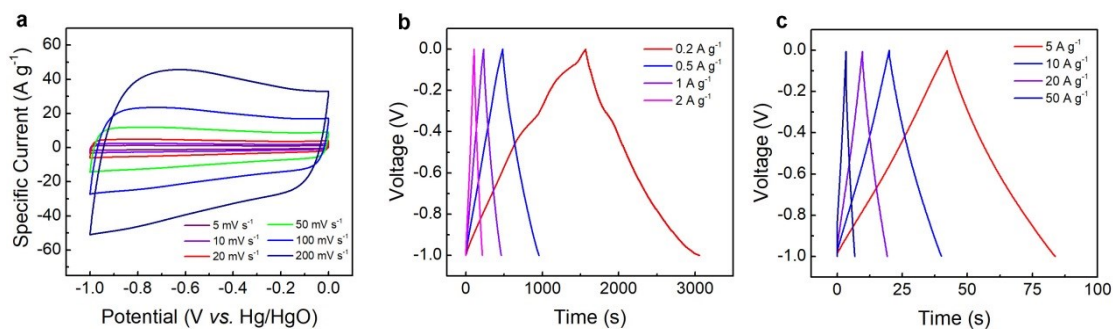

**Fig. S4** (a) CV curve at scan rate from 5-200 mV s<sup>-1</sup> (b-c) Galvanostatic charge/discharge curves under different current densities ranging from 0.2-50 A g<sup>-1</sup>

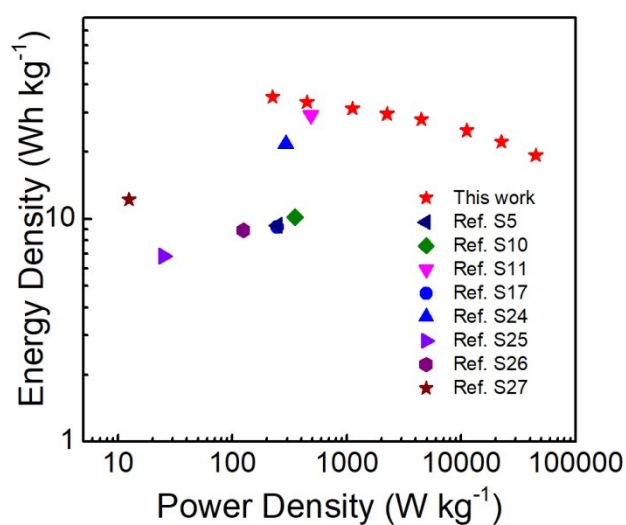

**Fig. S5** (a) Energy density and power density of GQDs/Gr (Power density of 225 W kg<sup>-1</sup> and energy density of 35.1 Wh kg<sup>-1</sup>) compared with other biomass based supercapacitor

**Table S1.** Electrochemical performance of biomass-based supercapacitors.

| Product                        | Resources     | Specific capacitance (F g <sup>-1</sup> ) and Cycling Stability (%)           | Relaxation time constant (τ0) | Conductivity Resistance (Ω) | Ref.             |
|--------------------------------|---------------|-------------------------------------------------------------------------------|-------------------------------|-----------------------------|------------------|
| <b>GQDs/Gr hetero-junction</b> | <b>Lignin</b> | <b>404.6 F g<sup>-1</sup> (0.1 A g<sup>-1</sup>)<br/>97 % (10,000 cycles)</b> | <b>0.3 s</b>                  | 0.344                       | <b>This work</b> |
| Activated Carbon               | Lignin        | 102.3 F g <sup>-1</sup> (1 A g <sup>-1</sup> )<br>Not given                   | 1.25 s                        | 0.391                       | S1               |

|                                      |                                   |                                                                         |        |      |     |
|--------------------------------------|-----------------------------------|-------------------------------------------------------------------------|--------|------|-----|
| carbon fiber                         | Lignin                            | 155 F g <sup>-1</sup> (0.1 A g <sup>-1</sup> )<br>94%(6,000 cycles)     | -      | -    | S2  |
| Electrospun carbon fiber             | Lignin                            | 267.32 F g <sup>-1</sup> (5 A g <sup>-1</sup> )<br>96.7%(5,000 cycles)  | -      | -    | S3  |
| Porous carbons                       | Lignin                            | 208 F g <sup>-1</sup> (0.1 A g <sup>-1</sup> )<br>96%(1500 cycles)      | -      | ~1.6 | S4  |
| Porous carbons                       | Lignin and melamine               | 337 F g <sup>-1</sup> (0.5 A g <sup>-1</sup> )<br>98% (3000 cycles)     | -      | 0.6  | S5  |
| Lignosulfonate/ Graphene             | Lignosulfonate and GO             | 408 F g <sup>-1</sup> (1 A g <sup>-1</sup> )<br>84% (10,000 cycles)     | 0.56 s | 0.4  | S6  |
| Porous carbon nanospheres            | Resorcinol and formaldehyde resin | 402.5 F g <sup>-1</sup> (1 A g <sup>-1</sup> )<br>96% (5,000 cycles)    | 3 s    | -    | S7  |
| Porous nitrogen-doped carbon         | lignin-derived byproduct          | 312 F g <sup>-1</sup> (1 A g <sup>-1</sup> )<br>98 % (20,000 cycles)    | 0.49 s | 0.29 | S8  |
| N,S-codoped porous carbon nanosheets | willow catkin                     | 298 F g <sup>-1</sup> (0.5 A g <sup>-1</sup> )<br>98% (10,000 cycles)   | 4.54 s | 0.6  | S9  |
| porous carbon nanosheet              | Soybean milk powder               | 240.7 F g <sup>-1</sup> (1 A g <sup>-1</sup> )<br>89.3% (5000 cycles)   | ~1 s   | 0.6  | S10 |
| 1D carbon nanobelts                  | Tofu                              | 262 F g <sup>-1</sup> (0.5 A g <sup>-1</sup> )<br>102% (10,000 cycles)  | 0.9 s  | 0.3  | S11 |
| Activated carbon                     | Bark                              | 155 F g <sup>-1</sup> (0.5 A g <sup>-1</sup> )<br>96% (10,000 cycles)   | 1.62 s | 0.9  | S12 |
| Nitrogen-doped ginger straw carbon   | straw                             | 122 F g <sup>-1</sup> (0.5 A g <sup>-1</sup> )<br>82.7% (10,000 cycles) | 2.6 s  | 5.4  | S13 |
| Sheet-like porous carbon             | Walnut shell                      | 330 F g <sup>-1</sup> (0.1 A g <sup>-1</sup> )<br>95 % (10,000 cycles)  | 0.25 s | -    | S14 |

|                                                                                      |                         |                                                                                                                                                  |             |              |            |
|--------------------------------------------------------------------------------------|-------------------------|--------------------------------------------------------------------------------------------------------------------------------------------------|-------------|--------------|------------|
| Graphene-like<br>Porous Carbon<br>vertically<br>aligned graphene<br>nanosheet arrays | Lotus<br>Active<br>Bark | 340 F g <sup>-1</sup> (0.5 A g <sup>-1</sup> )<br>98% (10,000 cycles)<br>398 F g <sup>-1</sup> (0.5 A g <sup>-1</sup> )<br>96.3% (10,000 cycles) | -<br>0.59 s | 0.45<br>0.36 | S15<br>S16 |
|--------------------------------------------------------------------------------------|-------------------------|--------------------------------------------------------------------------------------------------------------------------------------------------|-------------|--------------|------------|

**Table S2.** Electrochemical performance of GQDs strategy modified carbon -based supercapacitors.

| Product                          | Resources                 | Specific capacitance<br>(F g <sup>-1</sup> )         | Relaxation time<br>constant ( $\tau_0$ ) | Ref.             |
|----------------------------------|---------------------------|------------------------------------------------------|------------------------------------------|------------------|
| <b>GQDs/Gr<br/>junction</b>      | <b>hetero-<br/>Lignin</b> | <b>404.6 F g<sup>-1</sup> (0.1 A g<sup>-1</sup>)</b> | <b>0.3 s</b>                             | <b>This work</b> |
| GQDs/Porous carbon               | Pluronic                  | 315 F g <sup>-1</sup> (1 A g <sup>-1</sup> )         | 5.62 s                                   | S17              |
| GQDs/Carbon<br>nanofiber         | PAN                       | 335 F g <sup>-1</sup> (1 A g <sup>-1</sup> )         | 0.44 s                                   | S18              |
| GQDs/Microporous<br>carbons      | Coal                      | 270 F g <sup>-1</sup> (0.1 A g <sup>-1</sup> )       | 16 s                                     | S19              |
| GQDs/Porous carbon<br>nanosheets | Coal                      | 230 F g <sup>-1</sup> (1 A g <sup>-1</sup> )         | -                                        | S20              |
| GQDs/Activated<br>Carbon         | Glucosamine               | 388 F g <sup>-1</sup> (1 A g <sup>-1</sup> )         | 0.68 s                                   | S21              |
| CDs/ graphene                    | Citric acid               | 338 F g <sup>-1</sup> (1 A g <sup>-1</sup> )         | -                                        | S22              |
| CDs/ graphene oxide<br>hydrogel  | Glucose and<br>GO         | 264 F g <sup>-1</sup> (1 A g <sup>-1</sup> )         | -                                        | S23              |

## Supporting References

- S1. D. Saha, Y. Li, Z. Bi, J. Chen, J. K. Keum, D. K. Hensley, H. A. Grappe, H. M. Meyer III, S. Dai and M. P. Paranthaman, *Langmuir*, 2014, **30**, 900-910.
- S2. P. Schlee, O. Hosseinaei, D. Baker, A. Landmér, P. Tomani, M. J. Mostazo-López, D. Cazorla-Amorós, S. Herou and M.-M. Titirici, *Carbon*, 2019, **145**, 470-480.
- S3. Z. Dai, P.-G. Ren, Y.-L. Jin, H. Zhang, F. Ren and Q. Zhang, *Journal of Power Sources*, 2019, **437**, 226937.
- S4. H. Li, D. Yuan, C. Tang, S. Wang, J. Sun, Z. Li, T. Tang, F. Wang, H. Gong and C. He, *Carbon*,

- 2016, **100**, 151-157.
- S5. L. Zhu, F. Shen, R. L. Smith, L. Yan, L. Li and X. Qi, *Chemical Engineering Journal*, 2017, **316**, 770-777.
- S6. F. Li, X. Wang and R. Sun, *Journal of Materials Chemistry A*, 2017, **5**, 20643-20650.
- S7. B. Chang, Y. Guo, Y. Li, H. Yin, S. Zhang, B. Yang and X. Dong, *Journal of Materials Chemistry A*, 2015, **3**, 9565-9577.
- S8. L. Zhang, T. You, T. Zhou, X. Zhou and F. Xu, *ACS applied materials & interfaces*, 2016, **8**, 13918-13925.
- S9. Y. Li, G. Wang, T. Wei, Z. Fan and P. Yan, *Nano Energy*, 2016, **19**, 165-175.
- S10. M. Chen, D. Yu, X. Zheng and X. Dong, *Journal of Energy Storage*, 2019, **21**, 105-112.
- S11. T. Ouyang, K. Cheng, F. Yang, L. Zhou, K. Zhu, K. Ye, G. Wang and D. Cao, *Journal of Materials Chemistry A*, 2017.
- S12. N. Yadav and S. Hashmi, *Sustainable Energy & Fuels*, 2020, 1730-1746.
- S13. Y. Zheng, H. Wang, S. Sun, G. Lu, H. Liu, M. Huang, J. Shi, W. Liu and H. Li, *Sustainable Energy & Fuels*, 2020.
- S14. T. Shang, Y. Xu, P. Li, J. Han, Z. Wu, Y. Tao and Q.-H. Yang, *Nano Energy*, 2020, **70**, 104531.
- S15. S. Y. Lu, M. Jin, Y. Zhang, Y. B. Niu, J. C. Gao and C. M. Li, *Advanced Energy Materials*, 2017, 1702545.
- S16. Z. Sun, M. Zheng, H. Hu, H. Dong, Y. Liang, Y. Xiao, B. Lei and Y. Liu, *Chemical Engineering Journal*, 2018, **336**, 550-561.
- S17. W. Tian, J. Zhu, Y. Dong, J. Zhao, J. Li, N. Guo, H. Lin, S. Zhang and D. Jia, *Carbon*, 2020, **161**, 89-96.
- S18. J. Zhao, J. Zhu, Y. Li, L. Wang, Y. Dong, Z. Jiang, C. Fan, Y. Cao, R. Sheng and A. Liu, *ACS Applied Materials & Interfaces*, 2020, **12**, 11669-11678.
- S19. S. Zhang, J. Zhu, Y. Qing, L. Wang, J. Zhao, J. Li, W. Tian, D. Jia and Z. Fan, *Advanced Functional Materials*, 2018, **28**, 1805898.
- S20. S. Zhang, J. Zhu, Y. Qing, C. Fan, L. Wang, Y. Huang, R. Sheng, Y. Guo, T. Wang and Y. Pan, *Materials today energy*, 2017, **6**, 36-45.
- S21. Y. Qing, Y. Jiang, H. Lin, L. Wang, A. Liu, Y. Cao, R. Sheng, Y. Guo, C. Fan and S. Zhang, *Journal of Materials Chemistry A*, 2019, **7**, 6021-6027.
- S22. G. Yuan, X. Zhao, Y. Liang, L. Peng, H. Dong, Y. Xiao, C. Hu, H. Hu, Y. Liu and M. Zheng, *Journal of Colloid and Interface Science*, 2019, **536**, 628-637.
- S23. H. Feng, P. Xie, S. Xue, L. Li, X. Hou, Z. Liu, D. Wu, L. Wang and P. K. Chu, *Journal of Electroanalytical Chemistry*, 2018, **808**, 321-328.
- S24. V. Sahu, S. Grover, G. Singh and R. K. Sharma, *RSC Advances*, 2016, **6**, 35014-35023.
- S25. P. Hao, Z. Zhao, Y. Leng, J. Tian, Y. Sang, R. I. Boughton, C. P. Wong, H. Liu and B. Yang, *Nano Energy*, 2015, **15**, 9-23.
- S26. M. S. Balathanigaimani, W.-G. Shim, M.-J. Lee, C. Kim, J.-W. Lee and H. Moon, *Electrochemistry Communications*, 2008, **10**, 868-871.
- S27. G. Zhao, C. Chen, D. Yu, L. Sun, C. Yang, H. Zhang, Y. Sun, F. Besenbacher and M. Yu, *Nano Energy*, 2018, **47**, 547-555.
